# Supplementary material
Source: PubMed Central journal article supplement (PMC4819899)
Supplement: ry150013suppa1.pdf [file ry150013suppa1.pdf]

**Table E1. Multivariate Cox Regression Analysis Including FTV<sub>2</sub>, pCR, and HR/HER2 Subtype**

|                                      | <b>Model 1:<br/>FTV<sub>2</sub> + ΔFTV<sub>2</sub></b> |              |        | <b>Model 2:<br/>FTV<sub>2</sub> + ΔFTV<sub>2</sub> + pCR</b> |              |        | <b>Model 3:<br/>FTV<sub>2</sub> + ΔFTV<sub>2</sub> + pCR +<br/>HR/HER2</b> |              |       |
|--------------------------------------|--------------------------------------------------------|--------------|--------|--------------------------------------------------------------|--------------|--------|----------------------------------------------------------------------------|--------------|-------|
| <b>Predictors</b>                    | <b>Hazard Ratios (95% CI) p-value</b>                  |              |        |                                                              |              |        |                                                                            |              |       |
| <b>FTV<sub>2</sub></b>               | 1.02                                                   | (1.01, 1.04) | <0.001 | 1.03                                                         | (1.01, 1.04) | <0.001 | 1.02                                                                       | (1.01, 1.04) | 0.002 |
| <b>ΔFTV<sub>2</sub></b>              | 0.99                                                   | (0.98, 1.01) | 0.38   | 0.99                                                         | (0.98, 1.01) | 0.29   | 0.99                                                                       | (0.98, 1.01) | 0.32  |
| <b>pCR</b>                           |                                                        |              |        |                                                              |              |        |                                                                            |              |       |
| <b>Complete Response</b>             |                                                        |              |        |                                                              |              |        |                                                                            |              |       |
| <b>Non-Responder</b>                 |                                                        |              |        | 1.52                                                         | (0.60, 3.82) | 0.38   | 1.65                                                                       | (0.63, 4.31) | 0.31  |
| <b>HR/HER2</b>                       |                                                        |              |        |                                                              |              |        |                                                                            |              |       |
| <b>HR + / HER2 -</b>                 |                                                        |              |        |                                                              |              |        |                                                                            |              |       |
| <b>HR - / HER2 -</b>                 |                                                        |              |        |                                                              |              |        | 0.94                                                                       | (0.34, 2.56) | 0.90  |
| <b>HER2 +</b>                        |                                                        |              |        |                                                              |              |        | 2.10                                                                       | (0.90, 4.89) | 0.09  |
| <b>Age (years)</b>                   |                                                        |              |        |                                                              |              |        |                                                                            |              |       |
|                                      | 0.99                                                   | (0.95, 1.03) | 0.54   | 0.98                                                         | (0.94, 1.02) | 0.31   | 0.98                                                                       | (0.94, 1.02) | 0.38  |
| <b>Race</b>                          |                                                        |              |        |                                                              |              |        |                                                                            |              |       |
| <b>White</b>                         |                                                        |              |        |                                                              |              |        |                                                                            |              |       |
| <b>African-American</b>              | 1.17                                                   | (0.51, 2.70) | 0.71   | 1.24                                                         | (0.53, 2.91) | 0.62   | 1.09                                                                       | (0.46, 2.61) | 0.84  |
| <b>Other</b>                         | 0.97                                                   | (0.22, 4.25) | 0.97   | 1.03                                                         | (0.24, 4.53) | 0.96   | 1.06                                                                       | (0.24, 4.59) | 0.94  |
| <b>Modified C-Statistic (95% CI)</b> | 0.70                                                   | (0.60, 0.80) |        | 0.69                                                         | (0.57, 0.81) |        | 0.69                                                                       | (0.58, 0.81) |       |

**Table E2. Multivariate Cox Regression Analysis Including FTV<sub>4</sub>, RCB, and HR/HER2 Subtype**

|                                      | Model 1:<br>FTV <sub>4</sub> + ΔFTV <sub>4</sub> |              |        | Model 2:<br>FTV <sub>4</sub> + ΔFTV <sub>4</sub> + RCB |               |        | Model 3:<br>FTV <sub>4</sub> + ΔFTV <sub>4</sub> + RCB +<br>HR/HER2 |               |        |
|--------------------------------------|--------------------------------------------------|--------------|--------|--------------------------------------------------------|---------------|--------|---------------------------------------------------------------------|---------------|--------|
| Predictors                           | Hazard Ratios (95% CI) p-value                   |              |        |                                                        |               |        |                                                                     |               |        |
| FTV <sub>4</sub>                     | 1.08                                             | (1.05, 1.11) | <0.001 | 1.08                                                   | (1.05, 1.12)  | <0.001 | 1.08                                                                | (1.05, 1.12)  | <0.001 |
| ΔFTV <sub>4</sub>                    | 0.99                                             | (0.98, 0.99) | 0.001  | 0.99                                                   | (0.98, 0.99)  | 0.001  | 0.99                                                                | (0.98, 1.00)  | 0.03   |
| <b>RCB Class</b>                     |                                                  |              |        |                                                        |               |        |                                                                     |               |        |
| 0: RCB Index 0                       |                                                  |              |        |                                                        |               |        |                                                                     |               |        |
| 1: RCB Index ≤ 1.36                  |                                                  |              |        | 0.66                                                   | (0.08, 5.56)  | 0.70   | 0.71                                                                | (0.08, 5.93)  | 0.75   |
| 2: 1.36 < RCB Index ≤ 3.28           |                                                  |              |        | 0.92                                                   | (0.33, 2.55)  | 0.87   | 1.38                                                                | (0.48, 3.96)  | 0.59   |
| 3: RCB Index > 3.28                  |                                                  |              |        | 3.68                                                   | (1.35, 10.00) | 0.01   | 5.10                                                                | (1.71, 15.25) | 0.003  |
| <b>HR/HER2</b>                       |                                                  |              |        |                                                        |               |        |                                                                     |               |        |
| HR + / HER2 -                        |                                                  |              |        |                                                        |               |        |                                                                     |               |        |
| HR - / HER2 -                        |                                                  |              |        |                                                        |               |        | 2.88                                                                | (1.08, 7.64)  | 0.03   |
| HER2 +                               |                                                  |              |        |                                                        |               |        | 3.71                                                                | (1.42, 9.71)  | 0.007  |
| <b>Age (years)</b>                   |                                                  |              |        |                                                        |               |        |                                                                     |               |        |
|                                      | 1.00                                             | (0.97, 1.04) | 0.85   | 0.99                                                   | (0.95, 1.03)  | 0.54   | 0.99                                                                | (0.94, 1.04)  | 0.62   |
| <b>Race</b>                          |                                                  |              |        |                                                        |               |        |                                                                     |               |        |
| White                                |                                                  |              |        |                                                        |               |        |                                                                     |               |        |
| African-American                     | 0.84                                             | (0.36, 2.00) | 0.70   | 0.85                                                   | (0.35, 2.09)  | 0.73   | 0.65                                                                | (0.25, 1.70)  | 0.38   |
| Other                                | 1.10                                             | (0.25, 4.80) | 0.90   | 1.40                                                   | (0.31, 6.21)  | 0.66   | 1.40                                                                | (0.32, 6.16)  | 0.66   |
| <b>Modified C-Statistic (95% CI)</b> |                                                  |              |        |                                                        |               |        |                                                                     |               |        |
|                                      | 0.68                                             | (0.57, 0.79) |        | 0.72                                                   | (0.60, 0.84)  |        | 0.72                                                                | (0.59, 0.84)  |        |

**Table E3. Multivariate Cox Regression Analysis including FTV<sub>2</sub>, RCB, and HR/HER2 Subtype**

|                                      | Model 1:<br>FTV <sub>2</sub> + ΔFTV <sub>2</sub> |               |        | Model 2:<br>FTV <sub>2</sub> + ΔFTV <sub>2</sub> + RCB |              |       | Model 3:<br>FTV <sub>2</sub> + ΔFTV <sub>2</sub> + RCB +<br>HR/HER2 |               |       |
|--------------------------------------|--------------------------------------------------|---------------|--------|--------------------------------------------------------|--------------|-------|---------------------------------------------------------------------|---------------|-------|
| Predictors                           | Hazard Ratios (95% CI) p-value                   |               |        |                                                        |              |       |                                                                     |               |       |
| FTV <sub>2</sub>                     | 1.03                                             | (1.01, 1.04)  | <0.001 | 1.02                                                   | (1.01, 1.04) | 0.003 | 1.02                                                                | (1.00, 1.03)  | 0.040 |
| ΔFTV <sub>2</sub>                    | 0.99                                             | (0.98, 1.01)  | 0.38   | 0.99                                                   | (0.98, 1.01) | 0.36  | 1.00                                                                | (0.98, 1.01)  | 0.56  |
| <b>RCB Class</b>                     |                                                  |               |        |                                                        |              |       |                                                                     |               |       |
| 0: RCB Index 0                       |                                                  |               |        |                                                        |              |       |                                                                     |               |       |
| 1: RCB Index ≤ 1.36                  |                                                  |               |        | 0.57                                                   | (0.07, 4.83) | 0.61  | 0.56                                                                | (0.07, 4.77)  | 0.60  |
| 2: 1.36 < RCB Index ≤ 3.28           |                                                  |               |        | 1.12                                                   | (0.41, 3.08) | 0.83  | 1.54                                                                | (0.54, 4.43)  | 0.42  |
| 3: RCB Index > 3.28                  |                                                  |               |        | 3.35                                                   | (1.16, 9.69) | 0.03  | 4.48                                                                | (1.39, 14.46) | 0.01  |
| <b>HR/HER2</b>                       |                                                  |               |        |                                                        |              |       |                                                                     |               |       |
| HR + / HER2 -                        |                                                  |               |        |                                                        |              |       |                                                                     |               |       |
| HR - / HER2 -                        |                                                  |               |        |                                                        |              |       | 1.71                                                                | (0.60, 4.84)  | 0.32  |
| HER2 +                               |                                                  |               |        |                                                        |              |       | 2.86                                                                | (1.10, 7.43)  | 0.03  |
| <b>Age (years)</b>                   |                                                  |               |        |                                                        |              |       |                                                                     |               |       |
|                                      | 0.99                                             | (0.95, 1.03)  | 0.54   | 0.98                                                   | (0.94, 1.02) | 0.25  | 0.97                                                                | (0.92, 1.02)  | 0.21  |
| <b>Race</b>                          |                                                  |               |        |                                                        |              |       |                                                                     |               |       |
| White                                |                                                  |               |        |                                                        |              |       |                                                                     |               |       |
| African-American                     | 1.17                                             | (0.51, 2.70)  | 0.71   | 1.30                                                   | (0.52, 3.27) | 0.57  | 1.01                                                                | (0.39, 2.62)  | 0.98  |
| Other                                | 0.97                                             | (0.22, 0.425) | 0.97   | 1.22                                                   | (0.98, 1.01) | 0.36  | 1.22                                                                | (0.28, 5.38)  | 0.79  |
| <b>Modified C-Statistic (95% CI)</b> |                                                  |               |        |                                                        |              |       |                                                                     |               |       |
|                                      | 0.70                                             | (0.60, 0.80)  |        | 0.72                                                   | (0.60, 0.84) |       | 0.72                                                                | (0.60, 0.84)  |       |
